# Supplementary material for: Learning curve and functional outcomes after laser enucleation of the prostate for benign prostate hyperplasia according to surgeon’s caseload
Source: PubMed Central journal article supplement (PMC9712403; doi:10.1007/s00345-022-04177-y), 2022-10-26

**Figure 2.**

Enucleation time and operating time of 677 patients with laser enucleation of the prostate from the University Hospital Frankfurt between 11/2017 and 01/2022, stratified according to surgeon's caseload.

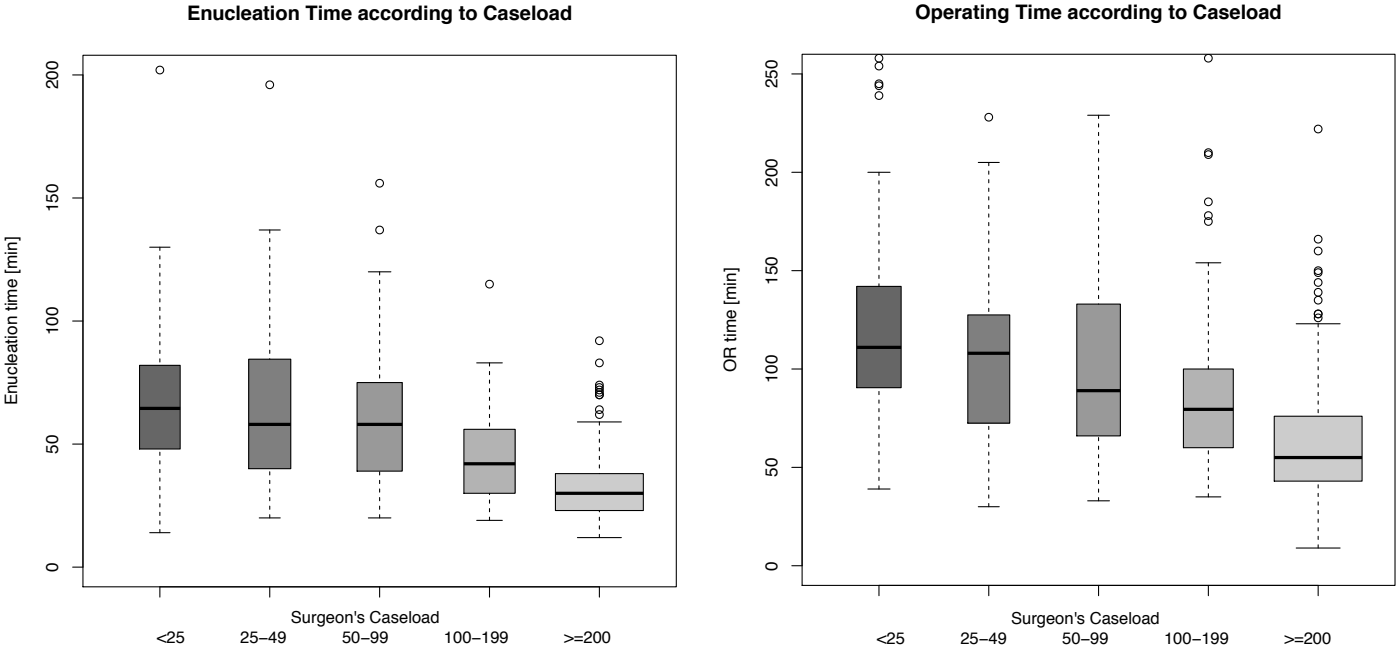

Supplement: 345_2022_4177_MOESM3_ESM.pdf [file 345_2022_4177_MOESM3_ESM.pdf]
