# Supplementary material for: Learning curve and functional outcomes after laser enucleation of the prostate for benign prostate hyperplasia according to surgeon’s caseload
Source: PubMed Central journal article supplement (PMC9712403; doi:10.1007/s00345-022-04177-y), 2022-10-26

### Mean ICIQ values over time according to caseload group

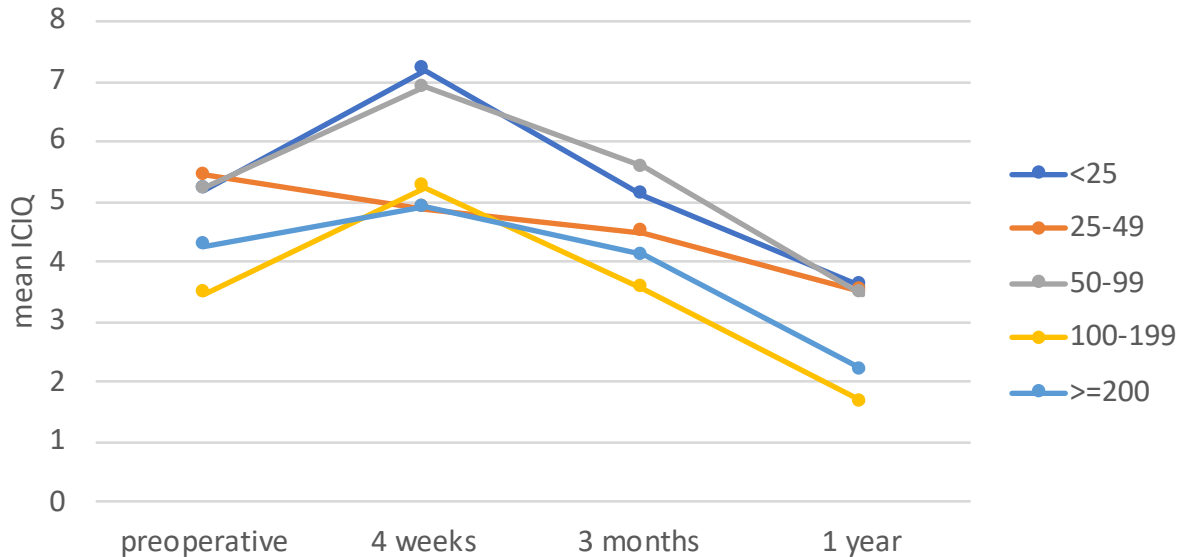

Supplement: 345_2022_4177_MOESM4_ESM.pdf [file 345_2022_4177_MOESM4_ESM.pdf]
